# Supplementary material
Source: Springer Nature journal article supplement (https://edoc.mdc-berlin.de/id/eprint/26546/2/26546suppl.zip)

# **A kinetics-based model of haematopoiesis reveals extrinsic regulation of skewed lineage output from stem cells**

---

In the format provided by the  
authors and unedited

---

## Supplementary Figures

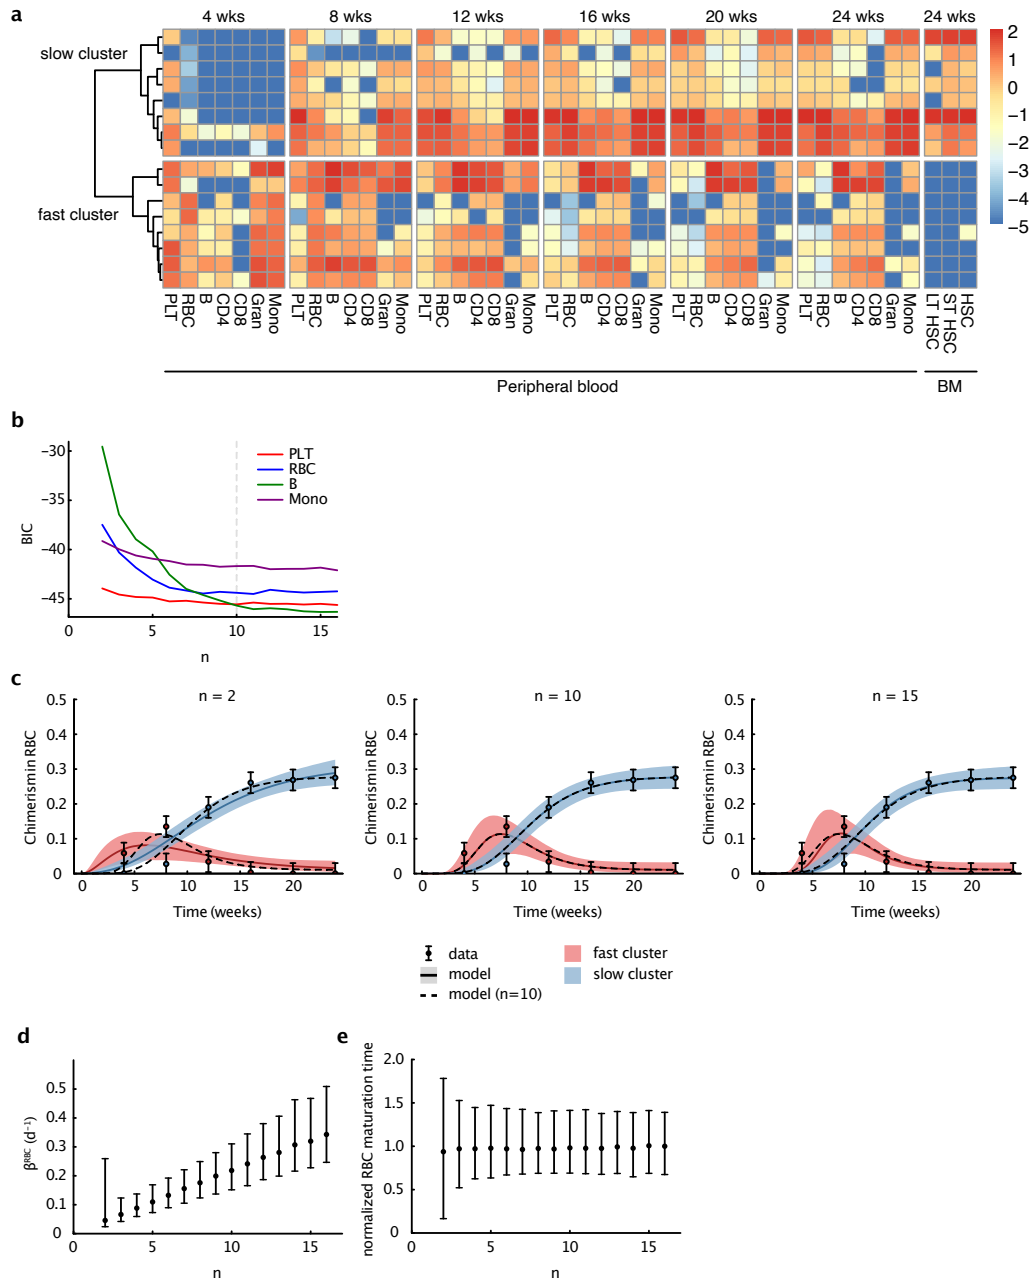

**Supplementary Fig.1: Classification of clones into fast and slow engrafting and effects of maturation step number (n) on model behaviour.** **a)** Hierarchical clustering of chimerism dynamics. Heatmap displaying the log<sub>10</sub>-transformed percentage of chimerism in peripheral blood at different time points post-transplantation and in the bone marrow at the endpoint (24 weeks). Each row represents a single HSC transplantation. Slow (top) and fast (bottom) clusters were obtained by hierarchical clustering of time-resolved chimerism values. **b)** Models with various n were fitted to the experimental data and the Bayesian information criterion (BIC)

was calculated for each number of steps ( $n$ ). Lines depict BIC for integer  $n$  values for platelets (PLT), red blood cells (RBC), B cells (B) and Monocytes (Mono). **c)** Exemplary model fits of chimerism dynamics for fast and slow clusters in RBCs with varied step numbers ( $n=2$ ,  $n=10$ ,  $n=15$ ). Dashed lines in each plot depict the median dynamics with  $n=10$ , for comparison. **d)** Parameter estimates for model parameter  $\beta$  given models with different number of steps. Dots show median values. Error bars show 95% confidence intervals. **e)** Total normalized maturation time from HSCs to mature cells given models with different number of steps. Dots show median values. Error bars show 95% confidence intervals. Maturation time was calculated in arbitrary units as  $n/\beta$  and then normalized to the median value at maximum  $n$ .

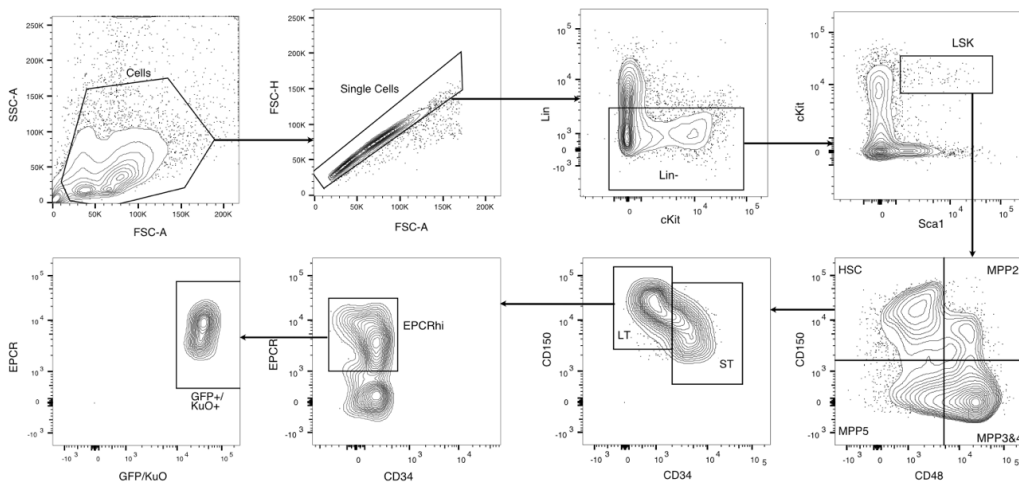

**Supplementary Fig.2:** Gating strategy to sort donor EPCRhi LT-HSCs for transplantations studies.

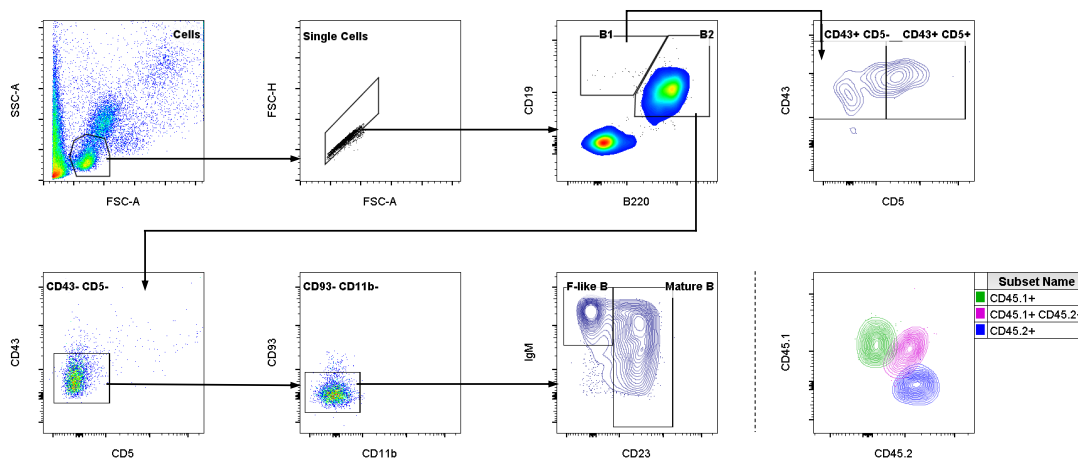

**Supplementary Fig.3:** Peripheral blood WBC gating strategy 1.

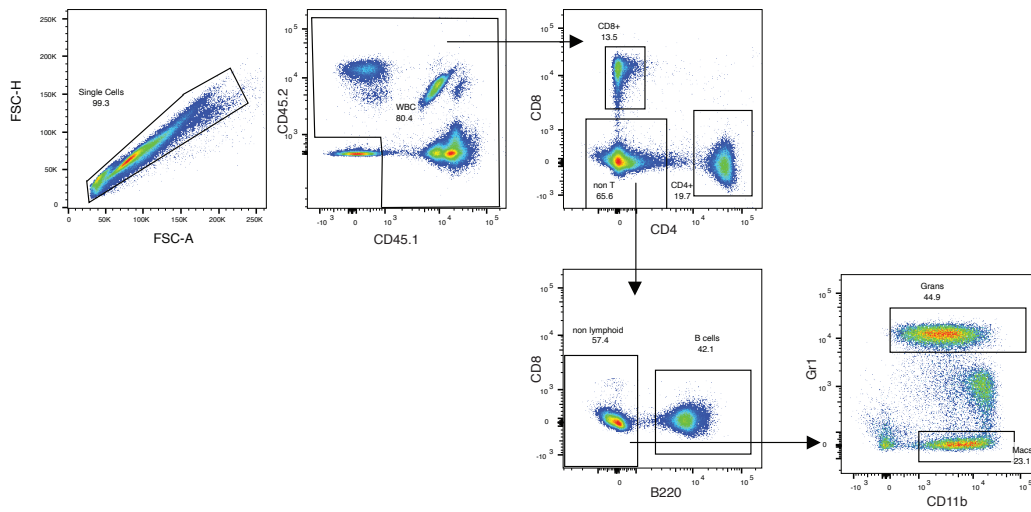

**Supplementary Fig.4:** Peripheral blood WBC gating strategy 2.

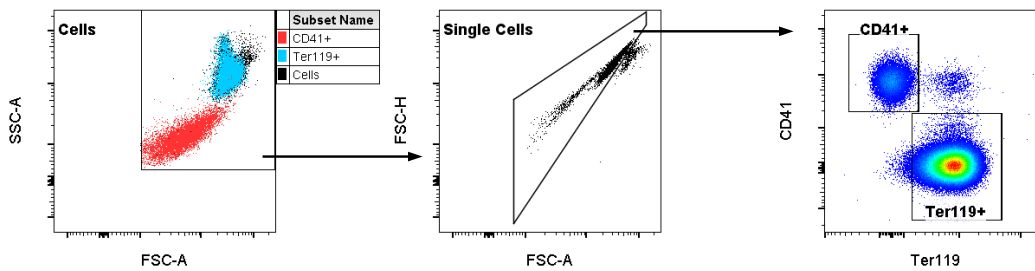

**Supplementary Fig.5:** Peripheral blood platelet and erythrocyte gating strategy.

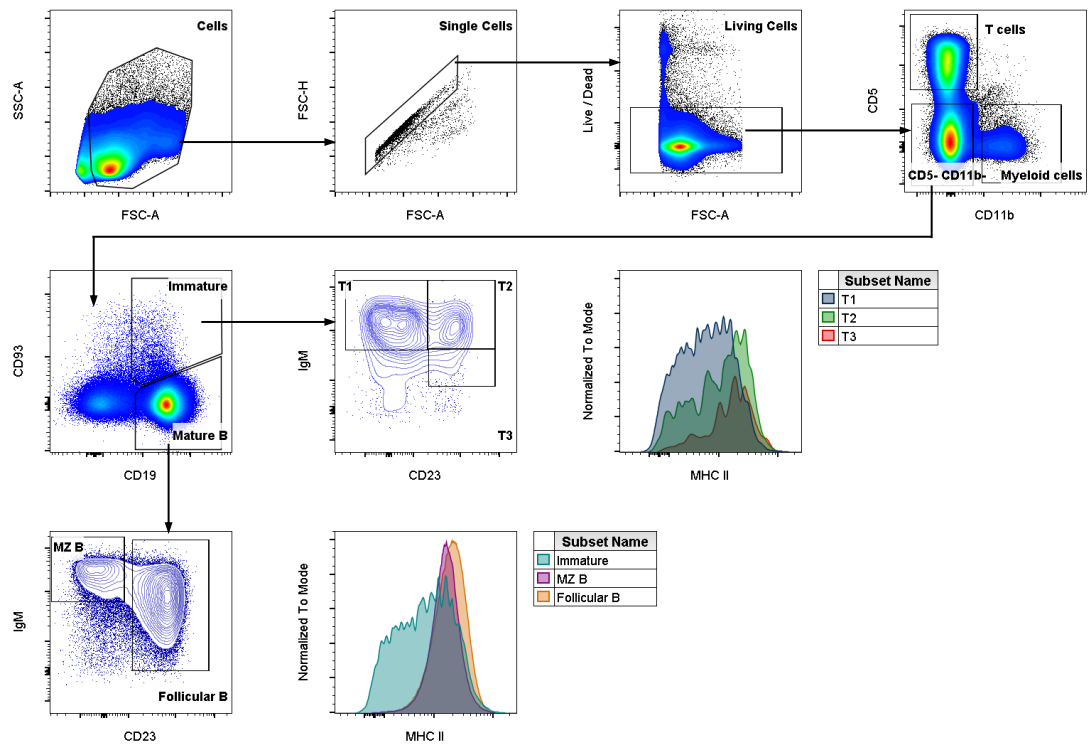

**Supplementary Fig.6: Spleen gating strategy.**

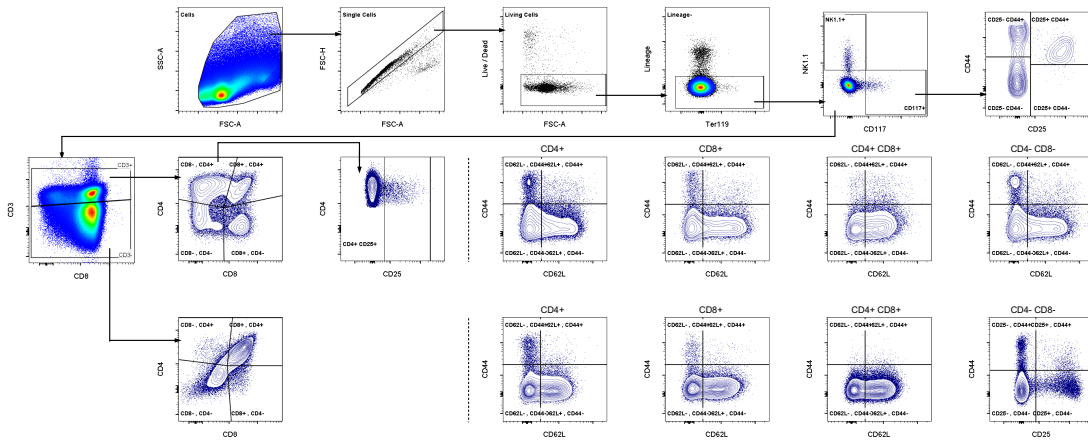

**Supplementary Fig.7: Thymus gating strategy.**

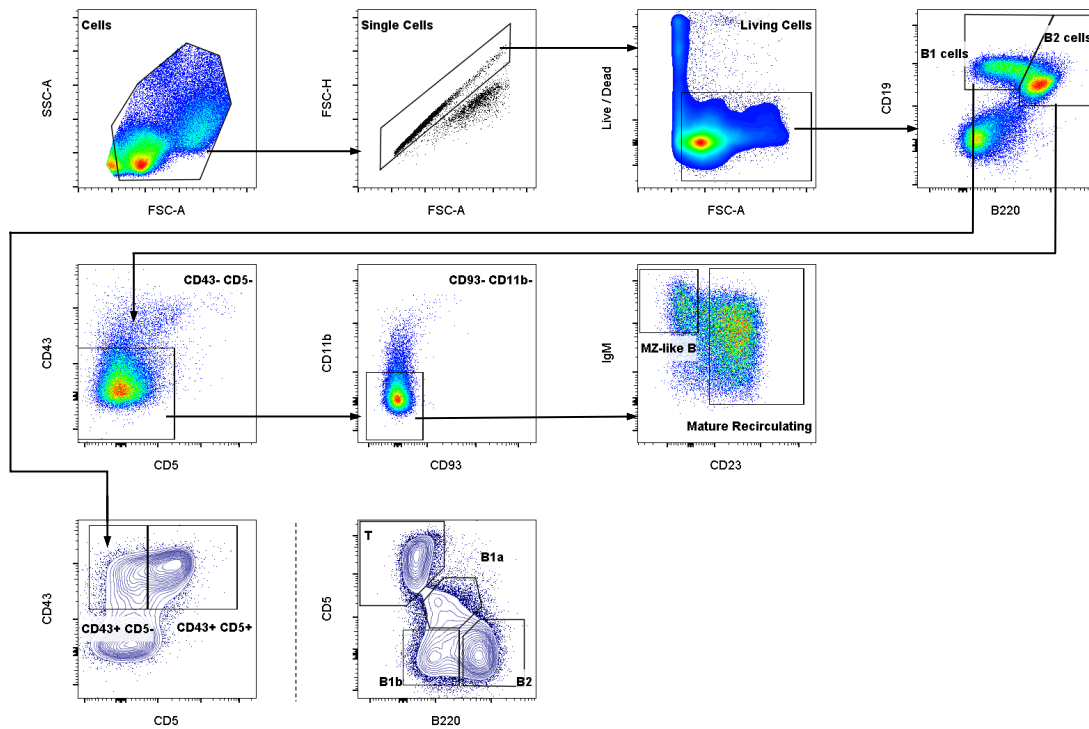

**Supplementary Fig.8:** Peritoneal cavity gating strategy.

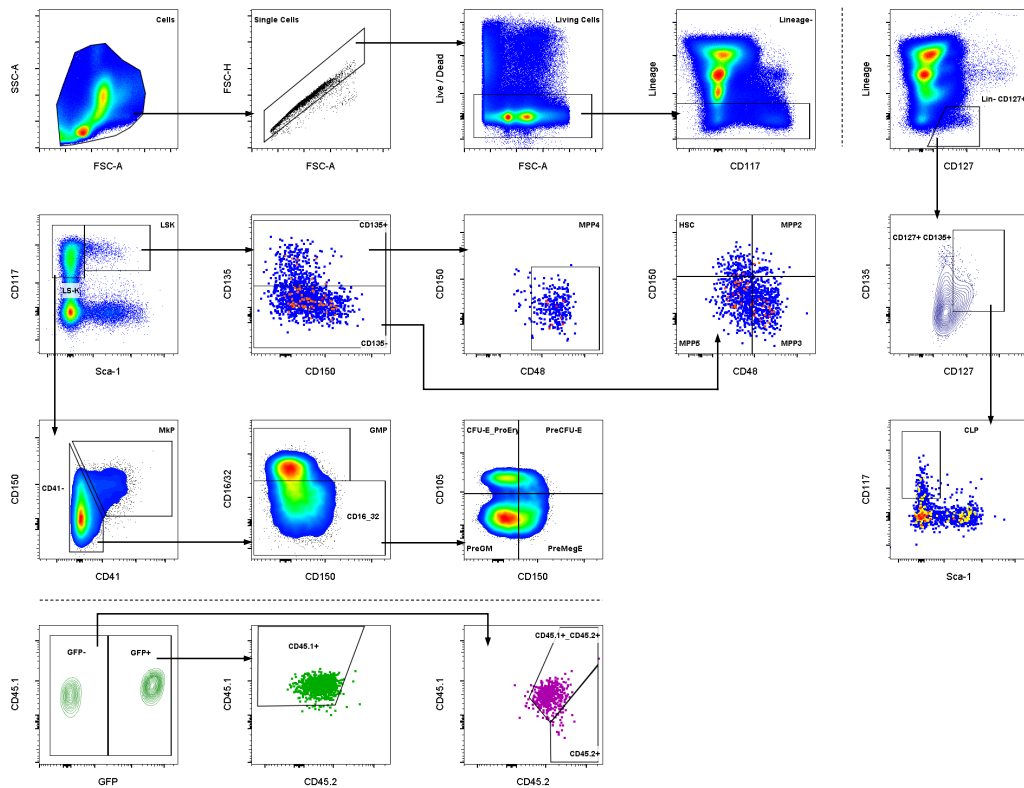

**Supplementary Fig.9:** Bone marrow gating strategy 1.

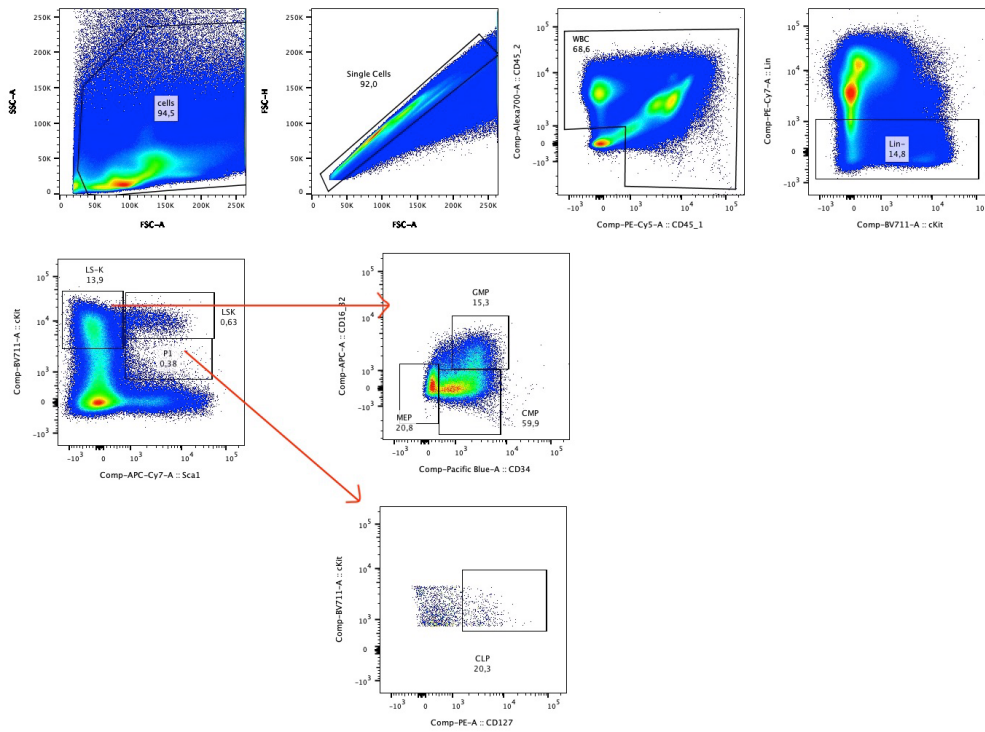

**Supplementary Fig.10: Bone marrow gating strategy 2.**

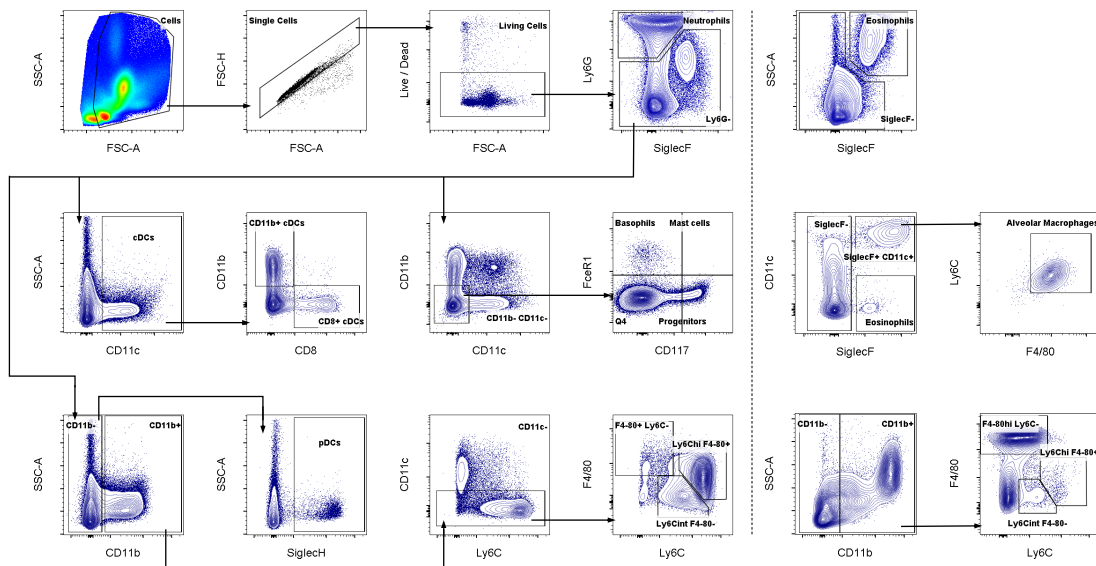

**Supplementary Fig.11: Bone marrow gating strategy 3.**

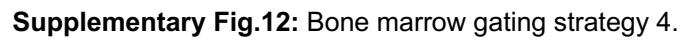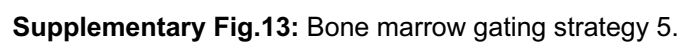

Supplement: MOESM1 [file 41556_2026_1958_MOESM1_ESM.pdf › 26546suppl/41556_2026_1958_MOESM1_ESM.pdf]
